# Supplementary material for: Survival and ice nucleation activity of bacteria as aerosols in a cloud simulation chamber
Source: Copernicus journal article supplement (doi:10.5194/acp-15-6455-2015), 2015-06-12
Supplement: Supplementary file 1 [file acp-15-6455-2015-supplement.pdf]

Supplement of Atmos. Chem. Phys., 15, 6455–6465, 2015  
<http://www.atmos-chem-phys.net/15/6455/2015/>  
doi:10.5194/acp-15-6455-2015-supplement  
© Author(s) 2015. CC Attribution 3.0 License.

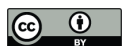

*Supplement of*

## **Survival and ice nucleation activity of bacteria as aerosols in a cloud simulation chamber**

**P. Amato et al.**

*Correspondence to:* P. Amato ([pierre.amato@univ-bpclermont.fr](mailto:pierre.amato@univ-bpclermont.fr))

The copyright of individual parts of the supplement might differ from the CC-BY 3.0 licence.

1 **Figure S1:** Temporal evolution of the absolute (as opposed to normalized to the value  
 2 measured at  $t = 30$  min after aerosolization) proportion of cultivable *P. syringae* 32b-74 and  
 3 *P. fluorescens* CGina-01 in each experiment. Details about the experimental conditions used  
 4 in each experiment are given in Table 1.

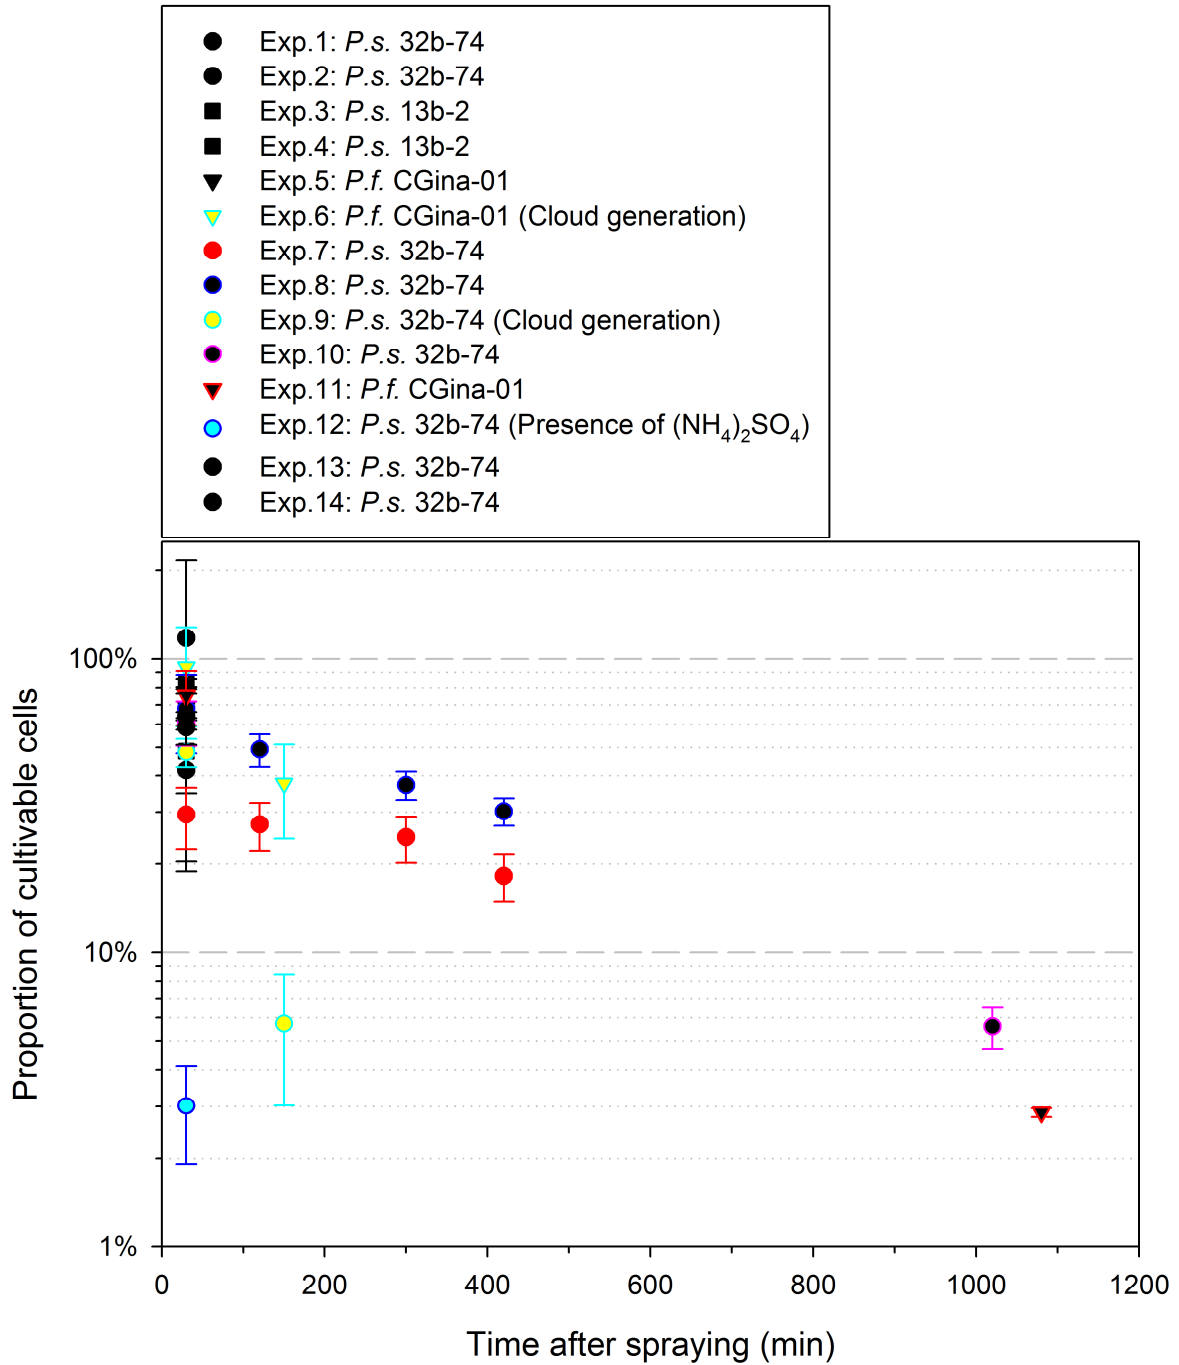

5

6
